# Supplementary figures and images for: Microchip electrophoresis with amperometric detection for a novel determination of phenolic compounds in olive oil
Source: Royal Society of Chemistry journal article supplement (doi:10.1039/c2an35844a), 2012-01-01

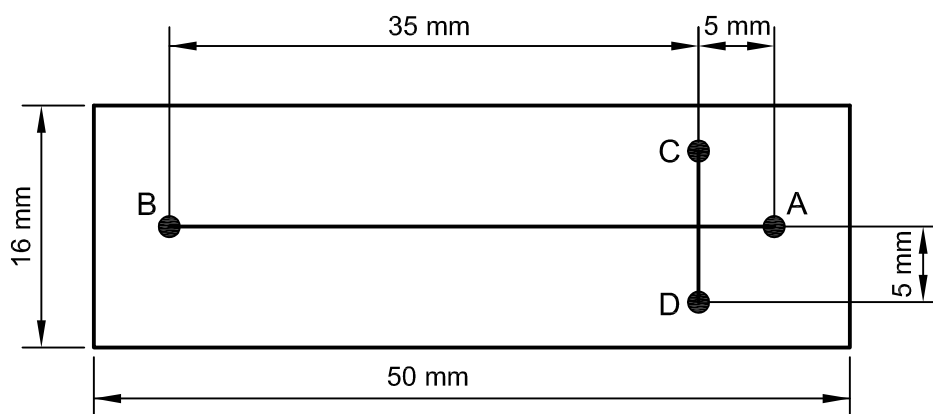

Separation channel dimensions  
(cross section)

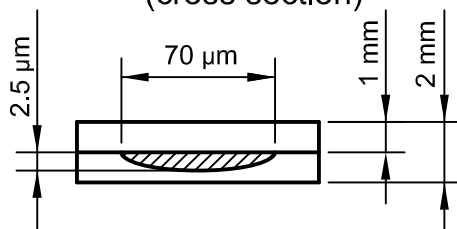

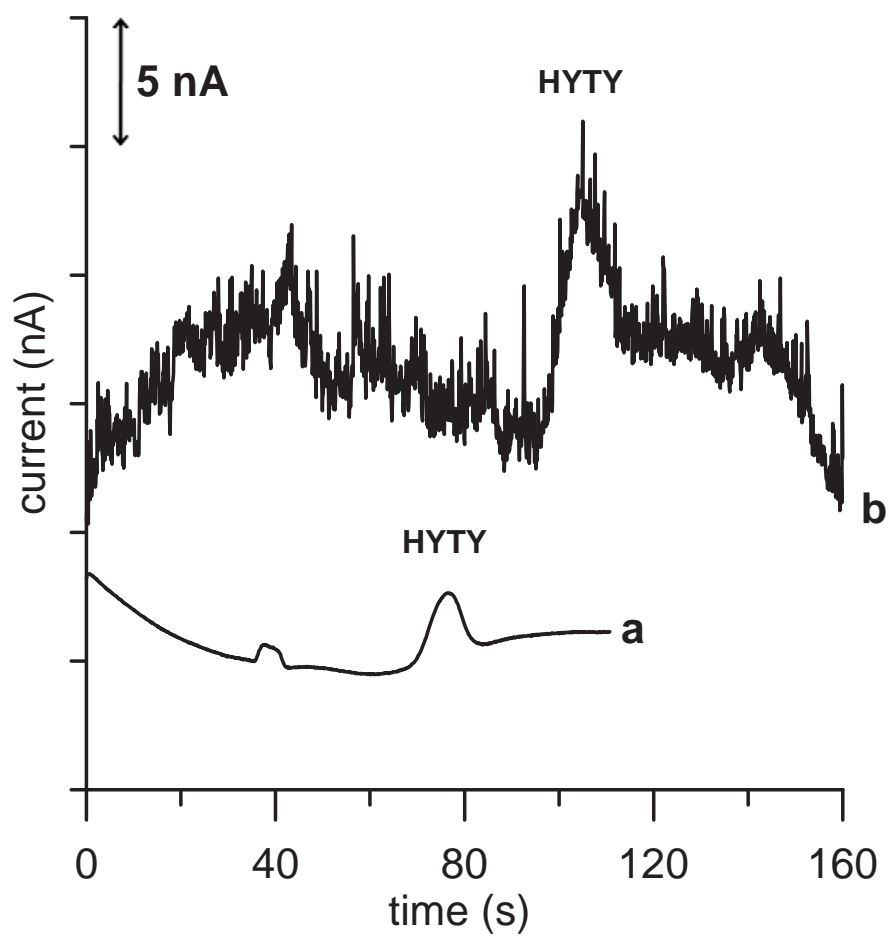

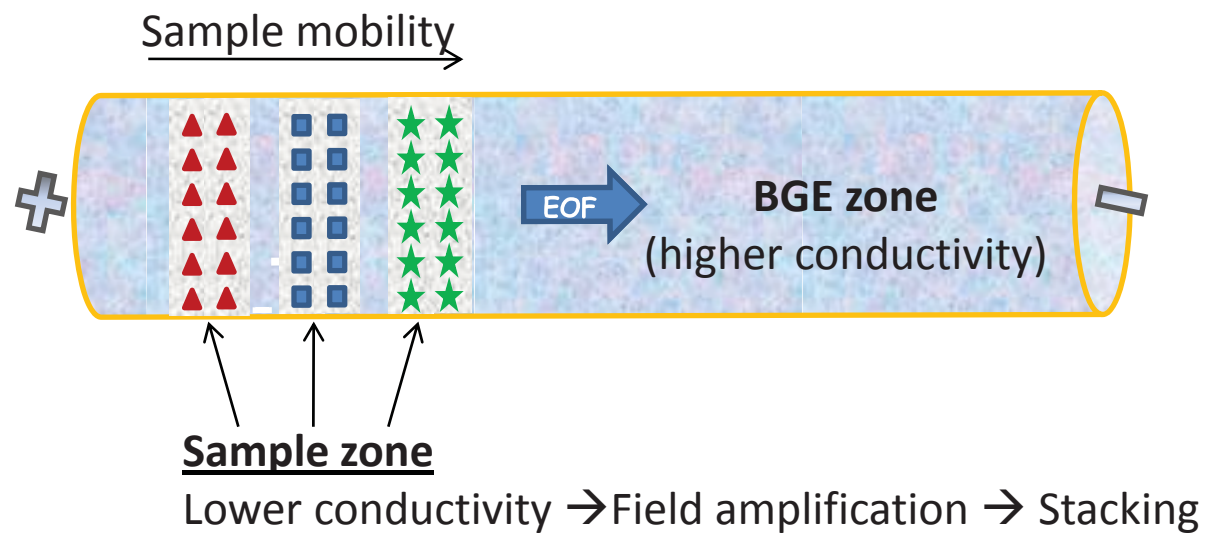

Supplement: c2an35844a.pdf [file c2an35844a.pdf]
